# Supplementary material for: Lymph node ratio, but not the total number of examined lymph nodes or lymph node metastasis, is a predictor of overall survival for pancreatic neuroendocrine neoplasms after surgical resection
Source: PubMed Central journal article supplement (PMC5687686; doi:10.18632/oncotarget.19184), 2017-07-12
Supplement: oncotarget-08-89245-s001.pdf [file oncotarget-08-89245-s001.pdf]

**Lymph node ratio, but not the total number of examined lymph nodes or lymph node metastasis, is a predictor of overall survival for pancreatic neuroendocrine neoplasms after surgical resection**

**SUPPLEMENTARY MATERIALS**

**Supplementary Table 1: Univariate and multivariate Cox regression analysis.**  
See\_Supplementary\_Table\_1
